# Supplementary material
Source: PubMed Central journal article supplement (PMC8092873)
Supplement: AAC.02328-20-s0001.pdf [file AAC.02328-20-s0001.pdf]

1 Supplementary Figures:

2 Supplementary Figure 1.

a) Unique sites

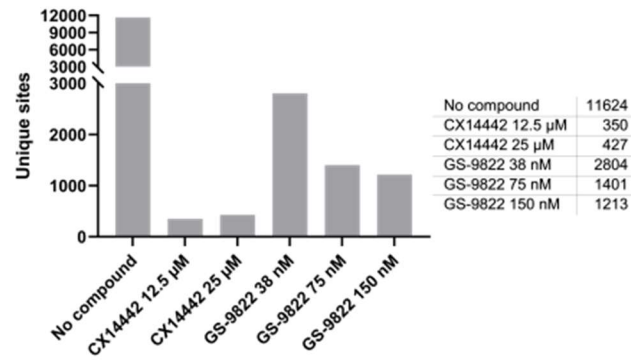

c)

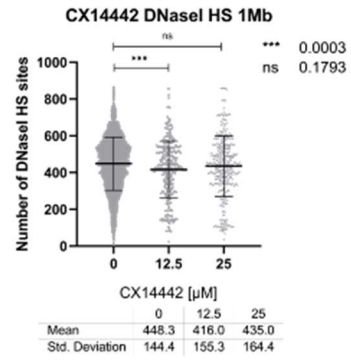

b) Integrated copies/million cells

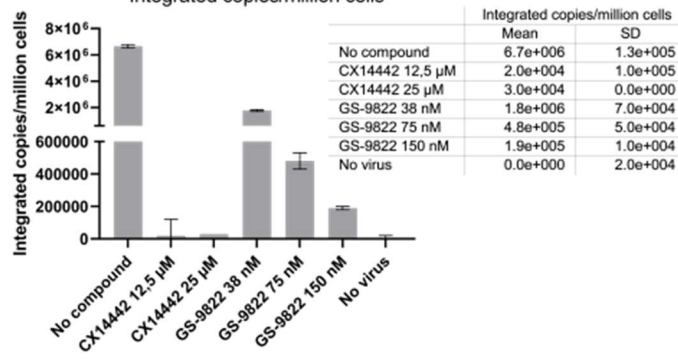

d)

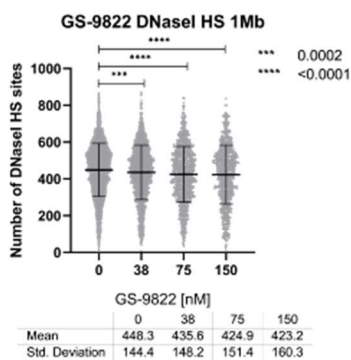

e)

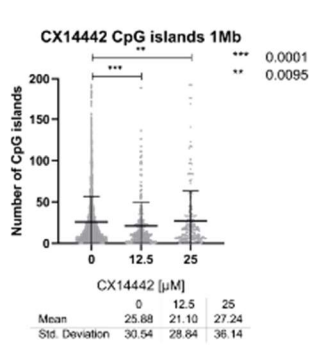

f)

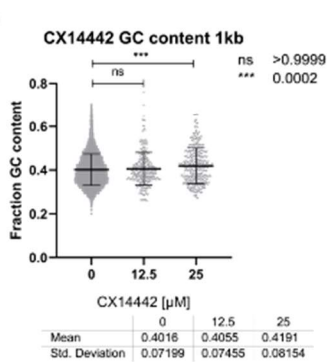

g)

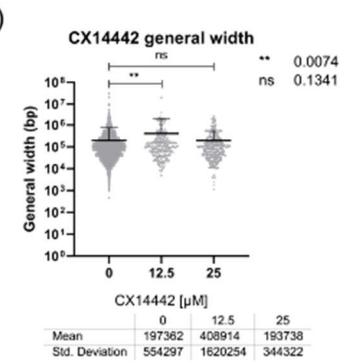

h)

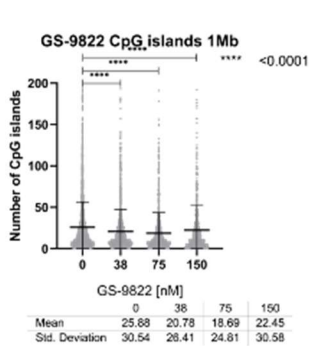

i)

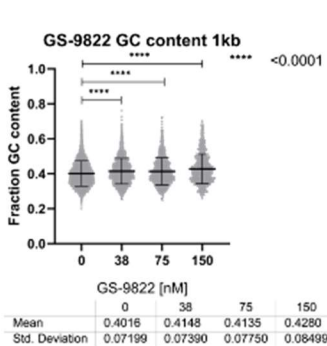

j)

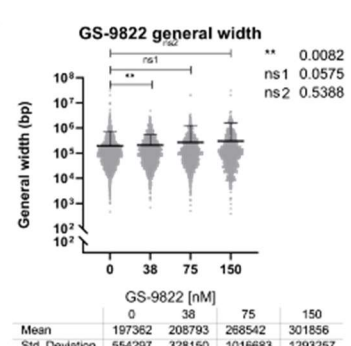

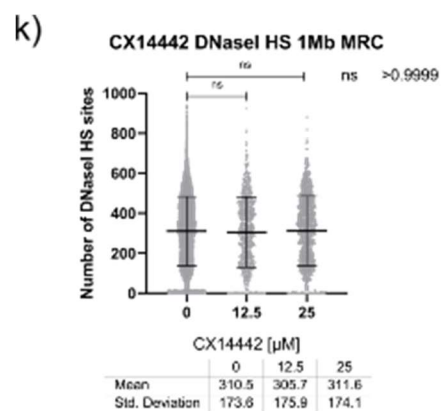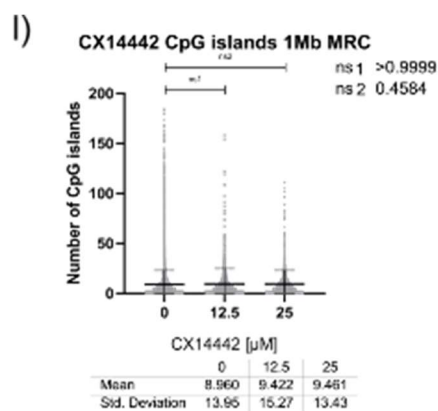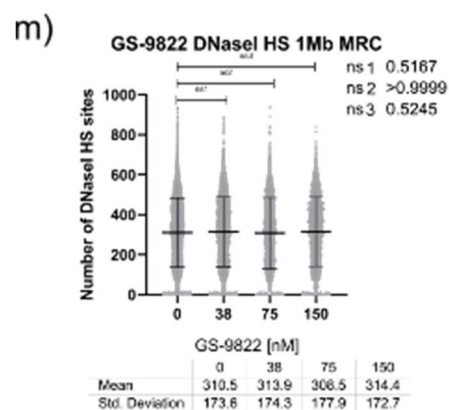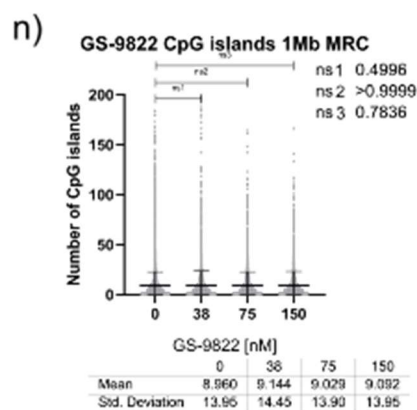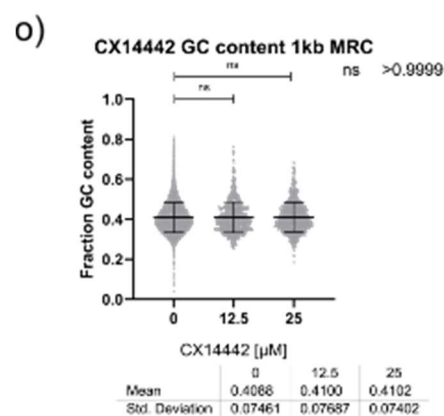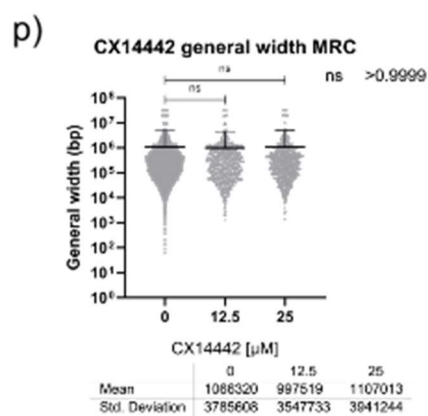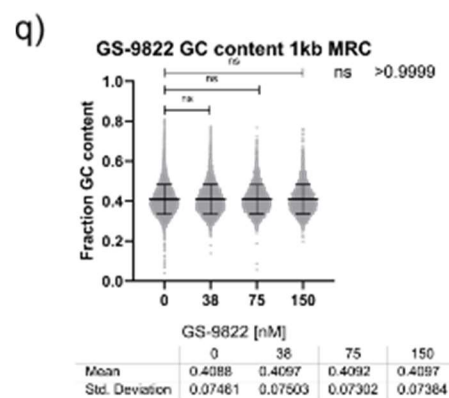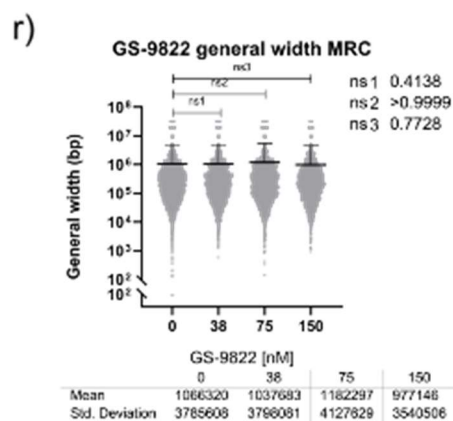

5 *Suppl. Fig. 1. GS-9822 retargets integration away from gene dense regions.*

6 a) Number of unique sites as determined by NGS analysis. b) Number of integrated copies/million  
7 cells determined on genomic DNA of NGS samples using Alu LTR and CCR5 qPCR. c-r) Impact of  
8 treatment with CX14442 or GS-9822 on integration sites with respect to genomic markers of gene  
9 density (at long range) or active chromatin. In each graph individual integration sites are shown  
10 per condition with mean values and standard deviations plotted on top and values tabulated  
11 below each graph. Samples were compared to the no compound condition using a Kruskal-Wallis  
12 test and p-values are listed beside the graphs. c, d, k, m) Number of DNase I hypersensitive sites  
13 within a 1 Mb range of integration sites (c, d) and matched random controls (k, m). e, h, l, n)  
14 Number of CpG islands within a 1Mb range for each integration site (e, h) and matched random  
15 controls (l, n). f, i, o, q) Relative GC content of the 1 kb region surrounding each integration site  
16 (f, i) and matched random controls (o, q). g, j, p, r) Width of genes and intergenic regions  
17 surrounding each integration site (g, j) and matched random controls (p, r). All samples were  
18 obtained from a single transduction experiment.

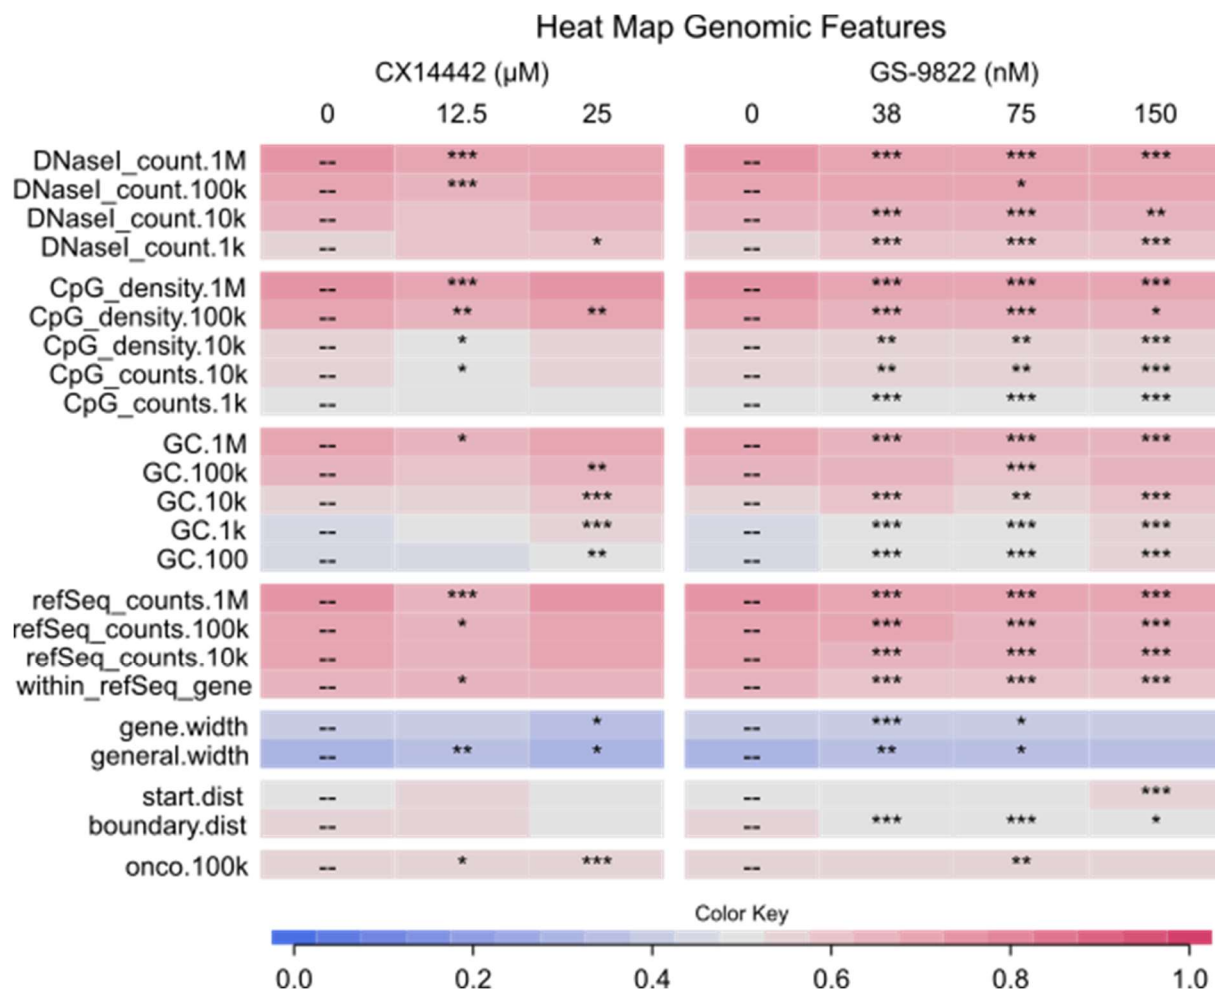

20

21 *Suppl. Fig. 2. Heat map representation of genomic features of lentiviral integration sites after*

22 *treatment with CX14442 and GS-9822.*

23 Illumina Miseq sequencing data were analyzed using the INSPIRED software and represented as

24 a heat map (1, 2). Colors indicate whether a genomic feature is favored (red) or disfavored (blue)

25 for integration as compared to computer generated matched random controls (MRCs) using a

26 receiver operating characteristic (ROC) curve area. Each integration site is compared to its MRC

27 and according to the rank of the integration site, a number is assigned (1 if the feature is favored

28 at the integration site over the MRC, 0 if it is disfavored and 0.5 if the feature is equal for the two

29 sites). The analysis was done for all integration sites after which an average was calculated. These  
30 ROC curve areas are then statistically analyzed using Wald type test statistics which are referred  
31 to the Chi Square distribution (\*= $p < 0.05$ , \*\*= $p = 0.01$ , \*\*\*= $p < 0.0001$ ).

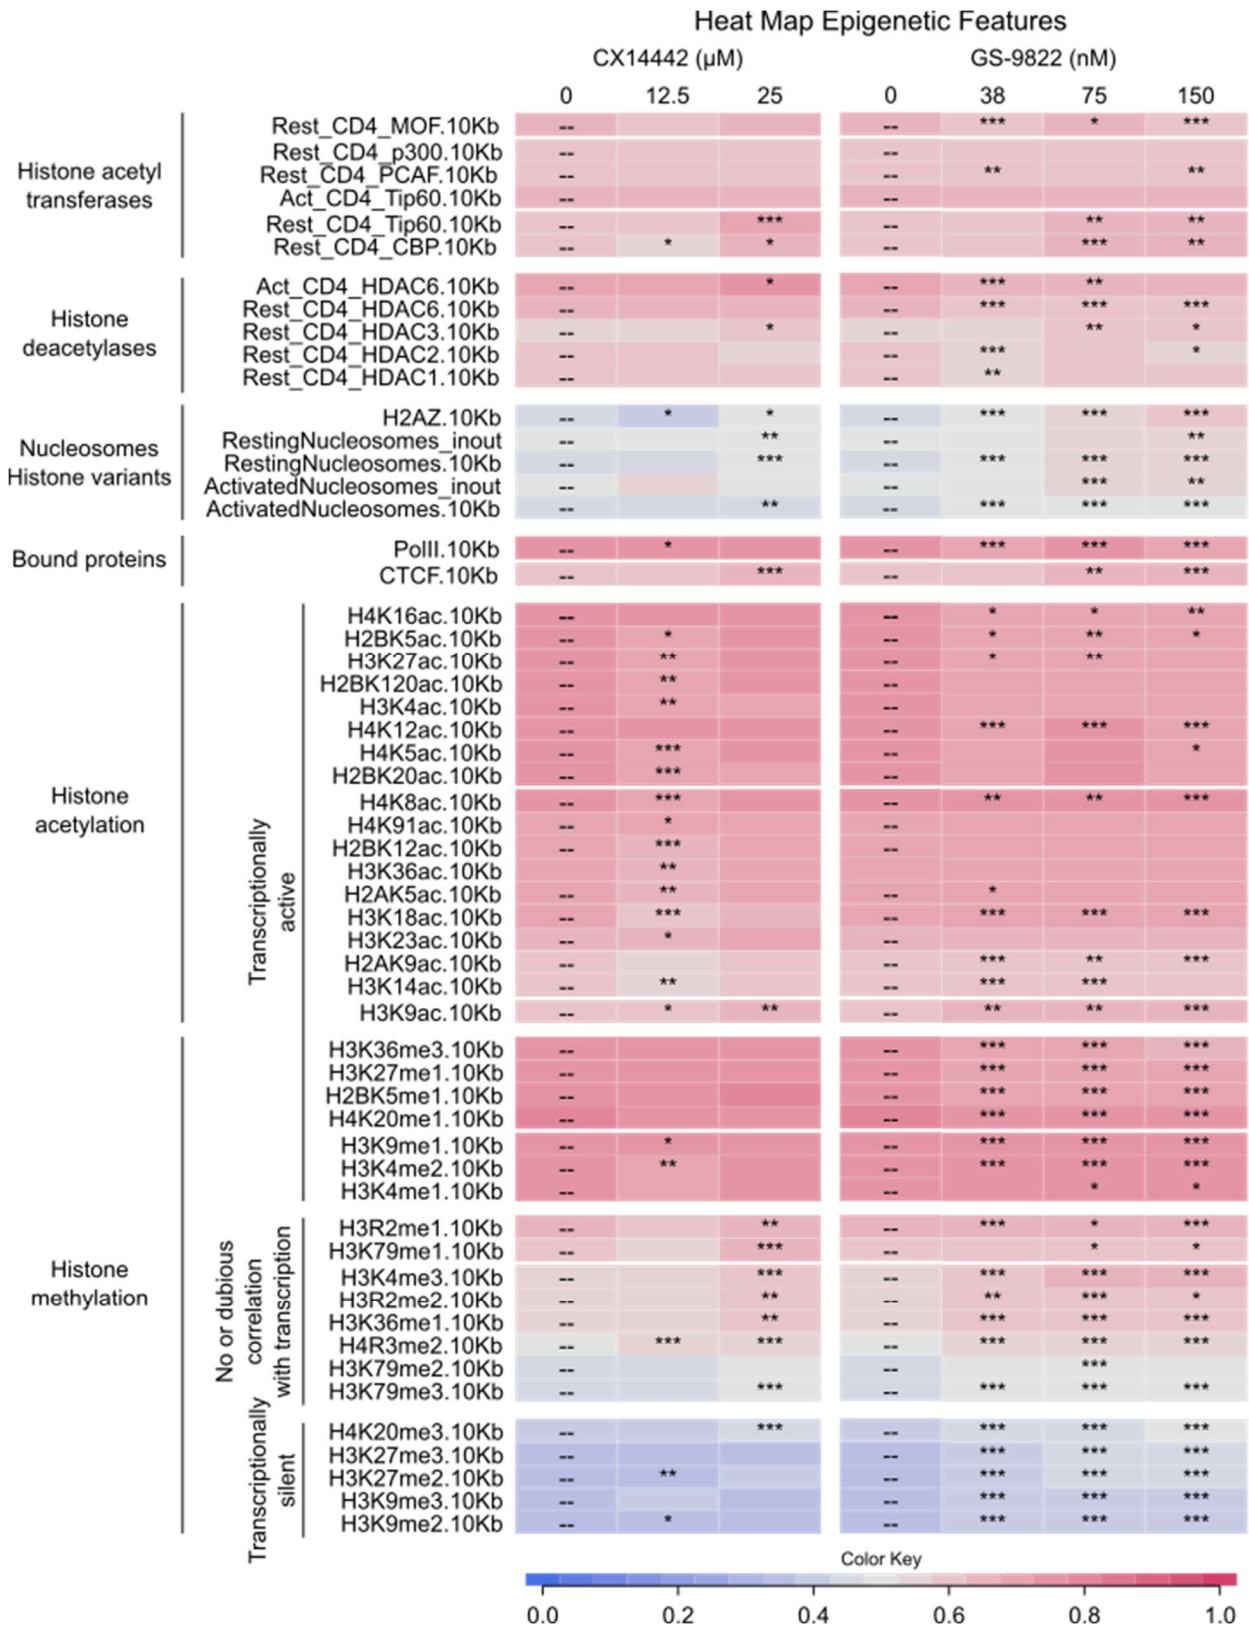

34 *Suppl. Fig. 3. Heat map representation of epigenetic features of lentiviral integration sites*

35 *after treatment with CX14442 and GS-9822.*

36 After Illumina Miseq sequencing, data were analyzed using the INSPIRED software, yielding the

37 heat map shown (1, 2). Color codes were as described in Suppl. Fig. 2. The ROC curve areas were

38 statistically analyzed using Wald type test statistics which are referred to the Chi Square

39 distribution (\*= $p < 0.05$ , \*\*= $p = 0.01$ , \*\*\*= $p < 0.0001$ ).

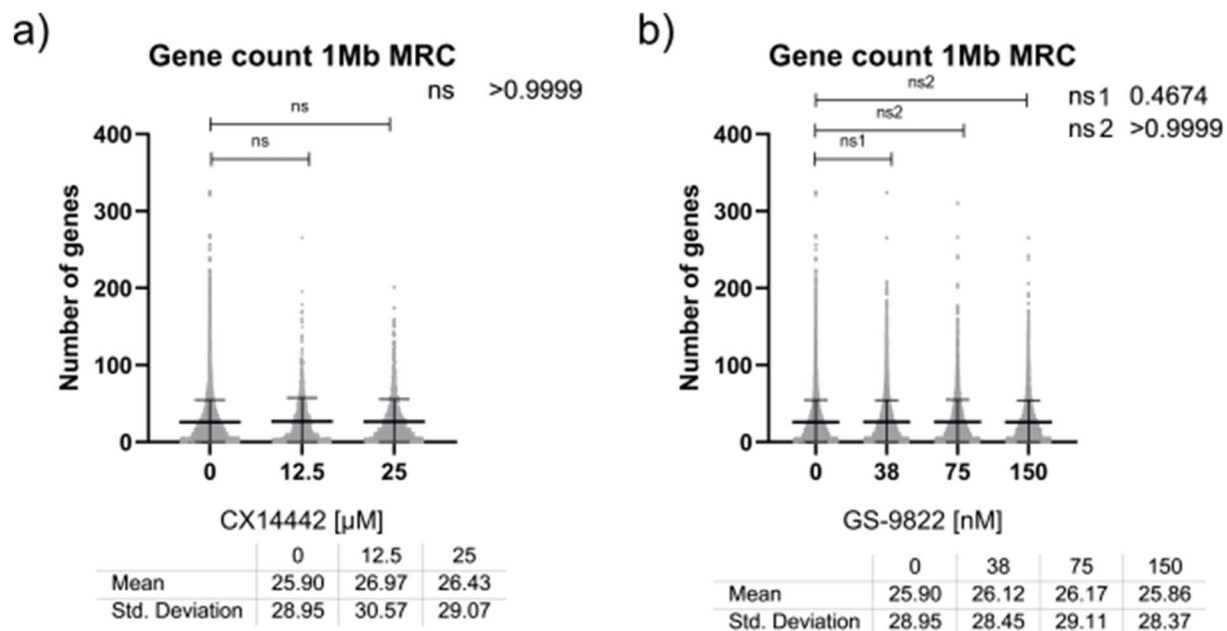

41

42 *Sup. Fig. 4 GS-9822 retargets integration away from gene dense regions; matched random*

43 *controls.*

44 SupT1 cells were transduced for 3 days with CH-SFFV-eGFP-P2A-fLuc in the presence or absence

45 of varying drug concentrations and kept in culture for at least 10 days. Next genomic DNA was

46 extracted for Illumina Miseq integration site sequencing and data were analyzed via the INSPIRED

47 platform. a, b) Graphs plotting the number of genes counted within a 1 Mb range of matched

48 random controls generated for each integration site for samples treated with CX14442 and GS-

49 9822, respectively. Annotated data was obtained using the University of California Santa Cruz

50 (UCSC) Genome Browser website (<http://genome.ucsc.edu>, UCSC Known Genes) (3, 4). Mean

51 values and standard deviations are plotted on top. Samples were compared to the no compound

52 condition using a Kruskal-Wallis test.



53 Supplementary Figure 5.

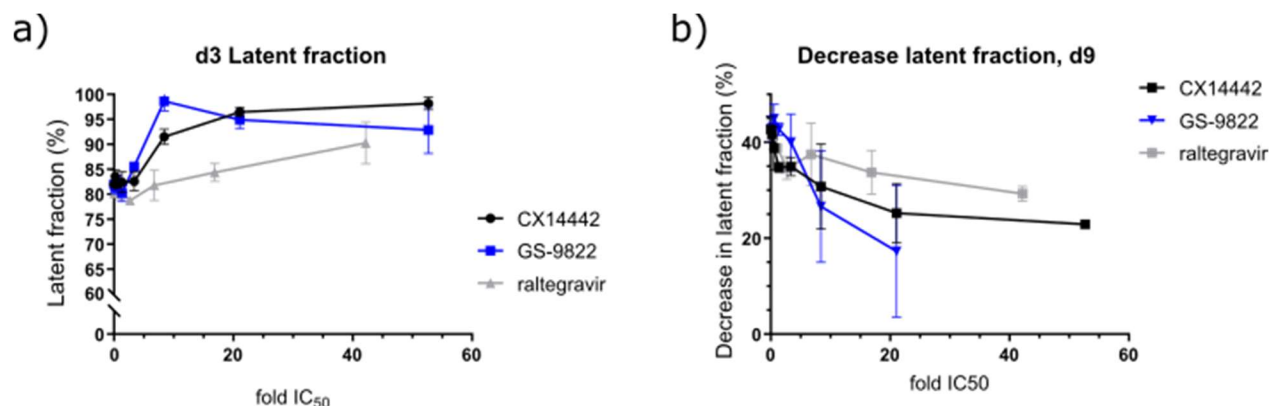

54

55 *Supplementary Figure 5. Treatment with CX14442 or GS9822 but not raltegravir increases*  
56 *immediate latency and decreases reactivation from latency in cells transduced with the HIV-1 OGH*  
57 *vector.*

58 Data of one representative experiment out of 4 plotting the average of duplicate measurements  
59 with standard deviation. SupT1 cells were transduced with a 1/20000 dilution of HIV-1 OGH. Cells  
60 were treated with increasing concentrations of CX14442, GS9822 or raltegravir. Compound  
61 concentrations are plotted as a fold of the IC<sub>50</sub>. The data represented here is the same as in Fig. 4  
62 d and Fig. 5 c, but here the data is represented on a linear axis, rather than a logarithmic one. a)  
63 The latent fraction (percentage of single mKO2 positive cells/(percentage of single mKO2 positive  
64 cells + percentage of double positive cells)\*100) or (quadrant C/ (quadrant B + quadrant C)) as  
65 shown in Fig. 3.c, was calculated three days post transduction. b) Upon reactivation, the latent  
66 fraction decreases and the plotted decrease in latent fraction is calculated by subtracting the  
67 latent fraction in the TNF $\alpha$  treated condition from the latent fraction in the non-treated condition  
68 9 days after transduction or 24 hours after reactivation with TNF $\alpha$ .

69 [References:](#)

- 70 1. Sherman E, Nobles C, Berry CC, Six E, Wu Y, Dryga A, Malani N, Male F, Reddy S, Bailey A,  
71 Bittinger K, Everett JK, Caccavelli L, Drake MJ, Bates P, Hacein-Bey-Abina S, Cavazzana M,  
72 Bushman FD. 2017. INSPIRED: A Pipeline for Quantitative Analysis of Sites of New DNA  
73 Integration in Cellular Genomes. *Mol Ther - Methods Clin Dev* 4:39–49.
- 74 2. Berry CC, Nobles C, Six E, Wu Y, Malani N, Sherman E, Dryga A, Everett JK, Male F, Bailey  
75 A, Bittinger K, Drake MJ, Caccavelli L, Bates P, Hacein-Bey-Abina S, Cavazzana M,  
76 Bushman FD. 2017. INSPIRED: Quantification and Visualization Tools for Analyzing  
77 Integration Site Distributions. *Mol Ther - Methods Clin Dev* 4:17–26.
- 78 3. Hsu F, Kent JW, Clawson H, Kuhn RM, Diekhans M, Haussler D. 2006. The UCSC known  
79 genes. *Bioinformatics* 22:1036–1046.
- 80 4. Haeussler M, Zweig AS, Tyner C, Speir ML, Rosenbloom KR, Raney BJ, Lee CM, Lee BT,  
81 Hinrichs AS, Gonzalez JN, Gibson D, Diekhans M, Clawson H, Casper J, Barber GP, Haussler  
82 D, Kuhn RM, Kent WJ. 2019. The UCSC Genome Browser database: 2019 update. *Nucleic  
83 Acids Res* 47:D853–D858.

84
